1 **Timing of Breakthrough Infection Risk After Vaccination Against SARS-CoV-2**

2

3 David N. Fisman MD MPH, Nelson Lee MD, MBBS and Ashleigh R. Tuite PhD MPH

4

5 Dalla Lana School of Public Health, University of Toronto, Toronto, Ontario, Canada

6

7

8 **Address reprint requests and correspondence to:**

9 David Fisman, MD MPH FRCP(C)

10 Room 686, 155 College Street, Toronto, Ontario, M5T 3M7

11 Email: [david.fisman@utoronto.ca](mailto:david.fisman@utoronto.ca)

12

13 Funding statement: The research was supported by a grant to DNF from the Canadians Institutes  
14 for Health Research (2019 COVID-19 rapid researching funding OV4-170360).

15

16 Declaration of competing interests: DNF has served on advisory boards related to influenza and  
17 SARS-CoV-2 vaccines for Seqirus, Pfizer, Astrazeneca and Sanofi-Pasteur Vaccines, and has  
18 served as a legal expert on issues related to COVID-19 epidemiology for the Elementary  
19 Teachers Federation of Ontario and the Registered Nurses Association of Ontario. ART was  
20 employed by the Public Health Agency of Canada when the research was conducted. The work  
21 does not represent the views of the Public Health Agency of Canada.

22

23 **Abstract**

24

25 **Background:** Provision of safe and effective vaccines has been a remarkable public health  
26 achievement during the SARS-CoV-2 pandemic. The effectiveness and durability of protection  
27 of the first two doses of SARS-CoV-2 vaccines is an important area for study, as are questions  
28 related to optimal dose combinations and dosing intervals.

29 **Methods:** We performed a case-cohort study to generate real-world evidence on efficacy of first  
30 and second dose of SARS-CoV-2 vaccines, using a population-based case line list and  
31 vaccination database for the province of Ontario, Canada between December 2020 and October  
32 2021. Risk of infection after vaccination was evaluated in all laboratory-confirmed vaccinated  
33 SARS-CoV-2 cases, and a 2% sample of vaccinated controls, evaluated using survival analytic  
34 methods, including construction of Cox proportional hazards models. Vaccination status was  
35 treated as a time-varying covariate.

36 **Results:** First and second doses of SARS-CoV-2 vaccine markedly reduced risk of infection  
37 (first dose efficacy 68%, 95% CI 67% to 69%; second dose efficacy 88%, 95% CI 87 to 88%).  
38 In multivariable models, extended dosing intervals were associated with lowest risk of  
39 breakthrough infection (HR for redosing 0.64 (95% CI 0.61 to 0.67) at 6-8 weeks).

40 Heterologous vaccine schedules that mixed viral vector vaccine first doses with mRNA second  
41 doses were significantly more effective than mRNA only vaccines. Risk of infection largely  
42 vanished during the time period 4-6 months after the second vaccine dose, but rose markedly  
43 thereafter.

44 **Interpretation:** A case-cohort design provided an efficient means to identify strong protective  
45 effects associated with SARS-CoV-2 vaccination, particularly after the second dose of vaccine.

46 However, this effect appeared to wane once more than 6 months had elapsed since vaccination.

47 Heterologous vaccination and extended dosing intervals improved the durability of immune

48 response.

49

## 50 **Introduction**

51

52           The rapid introduction of highly effective vaccines against SARS-CoV-2 represents a  
53 remarkable scientific achievement amidst the current global pandemic (1). It has been estimated  
54 that these vaccines have averted hundreds of thousands of deaths (2, 3). While mRNA vaccines  
55 represent the first application of a novel and highly immunogenic vaccine construct, viral vector  
56 vaccines have also been extremely effective in preventing severe illness and death (4). The  
57 introduction of novel vaccines against a virus that has been recognized for only two years (5),  
58 means that there is of necessity a great deal of uncertainty related to their application. The  
59 relative protection afforded by vaccines against emerging variants of concern (6), vaccine safety  
60 (7, 8), the immunogenicity of mixed vaccine schedules (9), optimal spacing between  
61 administration of doses (10), the number of doses required for a full primary series (11), and the  
62 necessity of future boosting (12), are all the subject of active study.

63           The Canadian province of Ontario represents a large (population 14.6 million) and  
64 diverse jurisdiction, with high levels of 2-dose SARS-CoV-2 vaccine coverage (approximately  
65 77% as of December 2021) (13, 14). The province has made use of several different vaccine  
66 formulations, predominantly BNT162b2 (BNT/Pfizer, “Cominrtv”), mRNA-1273 (Moderna,  
67 “SpikeVax”), and ChAdOX1-S (AstraZeneca, “Covishield”). Ontario’s vaccination program has  
68 prioritized risk groups over time. For example, the program initially focussed on vaccinating  
69 residents of long-term care facilities and health-care workers (15). Once higher risk groups were  
70 vaccinated, eligibility was expanded using a descending age-based approach. The province also  
71 consciously chose to offer extended dosing intervals to lower risk populations, due to supply  
72 constraints and the potential advantages of rapid, maximal coverage with first doses of vaccine

73 (16). Pediatric vaccination programs for those aged 5 to 11 years were introduced in in late  
74 November 2021 (17).

75 Beginning in autumn 2021, third doses have been offered to a growing list of individuals  
76 identified as being at elevated risk due to age, medical comorbidity or congregate living  
77 residence. Although there was some evidence suggesting that the use of prolonged dosing  
78 intervals in the primary series had resulted in durable immunity that made third doses  
79 unnecessary (18), the province expanded access to third vaccine to all aged 50 and over  
80 December 2021 (19). In late December, the rapid spread of the Omicron variant of concern in the  
81 province resulted in an expansion of third dose eligibility to all aged 18 and over who received  
82 their second dose at least 3 months previously.

83 A large, highly-vaccinated population like Ontario's, which has received a several  
84 different vaccination regimens, with variable dosing intervals, provides an opportunity to  
85 generate real-world evidence on efficacy of vaccination against breakthrough infections. The  
86 province's vaccination database and COVID-19 case line provide detailed information on  
87 vaccine administration as well as individual-level covariates that can be used to adjust for  
88 confounding by factors associated with both infection risk and vaccination priority. Our  
89 objective was to use these data to generate estimates of 1- and 2-dose vaccination protection over  
90 time, against breakthrough SARS-CoV-2 infection; we also performed exploratory analyses to  
91 generate hypotheses related to optimal dosing intervals and the relative efficacy of different  
92 vaccine combinations.

93

94

95 **Methods**

96

97 *Data Sources*

98           We created a cohort of individuals who received vaccination against SARS-CoV-2 in  
99 Ontario, without record of infection prior to the date of receipt of first vaccine dose. We  
100 included all reported cases of infection meeting these criteria, as well as a 2% random sample of  
101 vaccinated individuals with no record of infection. Cases were identified in the Province’s Case  
102 and Contact Management (CCM) database as described elsewhere (20, 21); we included only  
103 cases with a unique “pseudo-health card number”, which permitted linkage with the provincial  
104 vaccination database. Vaccination information on cases and controls was extracted from the  
105 Province’s COVaxON dataset (21), which includes dosage dates, vaccines used, basic  
106 demographic information, and fields on indication for vaccination, including residence in a  
107 congregate setting (including residence in a nursing home, retirement community, or other  
108 congregate setting), priority health condition, and healthcare worker status. As with cases, the  
109 pool of potential controls was limited to individuals with a pseudo-health card number. A flow  
110 diagram outlining creation of the cohort is presented in **Figure 1**.

111           We considered individuals to have been vaccinated with a first dose of vaccine during  
112 time at risk 14 or more days after the date of the first vaccine dose; individuals were considered  
113 vaccinated with two doses of vaccine during time at risk 14 or more days after second vaccine  
114 dose. While some researchers, including ourselves (21-23), have previously defined two dose-  
115 vaccinated time as commencing 7 or more days after second dose, we use the longer window for  
116 consistency with Canadian public health authorities (24).

117 *Analysis*

118 We performed a case-cohort analysis using survival analytic methods. As person time data were  
119 available, we were able to estimate hazard ratios directly using Cox proportional hazards models,  
120 rather than approximate such ratios via risk set sampling. Controls were reweighted by a factor  
121 of 50 to account for 2% selection probability. We stratified within-person time at risk according  
122 to an individual's vaccination status, which was treated as a time-varying covariate.

123 We created Cox proportional hazards models including only vaccination as an exposure  
124 (unvaccinated, single-dose vaccinated, or fully vaccinated), as well as adjusted models that  
125 adjusted for variables that we expected to confound observed vaccine effect. We evaluated the  
126 proportional hazards assumption both graphically using log-log plots, and statistically based on  
127 Schoenfeld residuals (25). As we found hazards of infection following vaccination to be non-  
128 proportional through inspection of log-log plots and testing of Schoenberg residuals  
129 (**Supplementary Figure**), we re-ran our Cox proportional hazards models with time at risk  
130 further stratified by 2-month blocks, within a given vaccination status.

131 Lastly, we performed restriction analyses in which we restricted cases individuals with  
132 infection due to a non-variant of concern viral strain, to infection with N501Y+ variants of  
133 concern (alpha, beta and gamma variants), and to infection with likely delta infection.  
134 Classification of likely variant status of the infecting strain was as described previously (21). We  
135 conducted all analyses in Stata version 15.1 using sts, stox and related commands. The study was  
136 conducted in accordance with the STROBE guidelines for observational research (26), and  
137 received ethics approval from the Research Ethics Board at the University of Toronto.

138

139

140

## 141 **Results**

142 Our final cohort consisted of 52,948 cases and 211,373 controls. Cases and controls  
143 differed significantly according to age distribution, sex, vaccine combination received,  
144 documented priority health condition, residence in a congregate setting, and healthcare worker  
145 status, as well as interval between first and second doses (**Table 1**). Crude time to breakthrough  
146 infection by vaccination status is presented as a Kaplan-Meier curve (**Figure 2**); vaccination was  
147 associated with significant reduction in infection risk, with 2-dose vaccination reducing risk  
148 relative to single dose vaccination ( $P < 0.001$  by log-rank test for all comparisons).

149 We constructed a Cox proportional hazards model that included only vaccination status;  
150 the hazard ratio for breakthrough infection after a single dose of vaccine was 0.32 (95% CI 0.31  
151 to 0.33); after a second dose of vaccine the hazard ratio declined to 0.12 (95% CI 0.12 to 0.13),  
152 corresponding to effectiveness of 68% and 88% against infection. We found little change in  
153 these after adjusting for potential confounders in multivariable models (**Table 2**). In  
154 multivariable analyses we identified a strong U-shaped relationship between dosing interval and  
155 risk of breakthrough infection, with risk lowest when vaccine doses were administered 6-8 weeks  
156 apart. Among individuals who received two doses of vaccine, increased risk of breakthrough  
157 infection was seen in those who received two doses of ChAdOx1-S, relative to two doses of  
158 mRNA vaccine. However, for individuals who received an initial dose of ChAdOx1-S, there  
159 was a significant reduction in breakthrough risk following a second dose of mRNA vaccine, in  
160 contrast to receipt of two doses of mRNA vaccine. Risk of breakthrough was highest in younger  
161 adults (aged 20-49), and was elevated in healthcare workers, those residing in congregate living  
162 settings, and in those identified as having priority medical conditions.



163           Models that stratified time at risk both by vaccination status and 60-day time blocks since  
164 vaccination generated similar results to initial multivariable models, demonstrating high efficacy  
165 of first and second vaccine doses (**Supplementary Table**). The lowest hazard ratio for  
166 breakthrough infection was seen between four and 6 months after second vaccine dose but  
167 increased after 6 months of observation (**Figure 3**). In exploratory restriction analyses in which  
168 we included only cases with non-variant of concern infection, cases with N501Y+ infection  
169 (alpha, beta or gamma variants), or cases with delta variant infection, we found significant  
170 protection against breakthrough infection with both 1 and 2 doses of vaccine, against all variants.  
171 However, there was significant heterogeneity across variants (P for heterogeneity < 0.001 for  
172 both 1 and 2 doses), with highest efficacy after two doses seen against N501Y+ infection  
173 (96.9%, 95% CI 96.7% to 97.1%), and lower efficacy seen against delta variant (66.1%, 95% CI  
174 62.5% to 69.4%) (**Table 3**).  
175

## 176 **Discussion**

177           We find that in a large cohort of vaccinated individuals in Ontario, Canada vaccination  
178 provided remarkable protection against breakthrough infection, with increased protection  
179 afforded by a second vaccine dose relative to a single dose. We also find that maximal  
180 protection against infection is provided 4-6 months after the second dose of vaccine, at which  
181 time protection against infection was nearly complete. However, we found that infection risk  
182 increased again after 6 months, suggesting the need for third vaccine doses at this interval (11).  
183 Consistent with effects demonstrated using viral neutralization assays (10), we find that the  
184 extended interval between first and second vaccine doses has resulted in enhanced immune  
185 protection, with a relative reduction in risk of approximately 40% when second vaccine doses  
186 were provided 6-8 weeks after first doses. We also identified significant protection against  
187 infection associated with heterologous vaccine schedules, in particular the use of initial dose  
188 ChAdOx1-S, followed by a second dose of mRNA vaccine, though viral vector vaccines are no  
189 longer in wide use in Canada due to concerns about risk of vaccine induced thrombotic  
190 thrombocytopenia (VITT)(7). However, the observed effects have substantial face validity and  
191 are consistent with the previously described immune enhancement seen with heterologous  
192 vaccination schedules as well as the high efficacy of mRNA booster vaccination following non-  
193 mRNA SARS-CoV-2 vaccination (27-31).

194           Our findings on vaccine efficacy are consistent with those reported by others using more  
195 typical cohort designs for study of vaccine efficacy. Our application of a case-cohort design,  
196 with both cases and controls contributing person-time to unvaccinated, and single- and double-  
197 dose vaccinated exposures, allowed us to generate these estimates without access to an

198 unvaccinated control group. The fact that all individuals in our study chose to be vaccinated  
199 potentially eliminates confounding by factors associated with vaccination choices.

200 Like any observational study, ours is potentially subject to confounding by measured and  
201 unmeasured factors, though inclusion of available covariates in multivariable models did not  
202 significantly change our estimates of vaccine effectiveness. We were also surprised at the sparse  
203 nature of data on healthcare worker status, congregate living status and priority health conditions  
204 in the CoVaxON dataset. The small number of individuals with these classifications suggests  
205 that the dataset is insensitive for these elements. However, inasmuch as CoVaxON data would  
206 have been recorded without knowledge of a case's subsequent infection status these missing data  
207 should not result in bias.

208 In summary, we use a case-cohort study with stratified person-time analysis of  
209 vaccination status to demonstrate the strong protection afforded by SARS-CoV-2 vaccines in  
210 Ontario, Canada. Despite this strong protection, we do find that an increase in hazard greater  
211 than 6 months after second dose of vaccine; our analysis also suggests that increased intervals  
212 between vaccine doses, as widely implemented in Canada, provides more durable protection  
213 against infection than shorter dosing intervals.

214

## 215 **Acknowledgements**

216 The authors wish to thank the staff at Public Health Ontario and Ontario's public health units for  
217 collecting, sequencing, analyzing, and providing access to the data used for this analysis.

**Figure 1. Flow Diagram for Creation of Case-Cohort Sample**

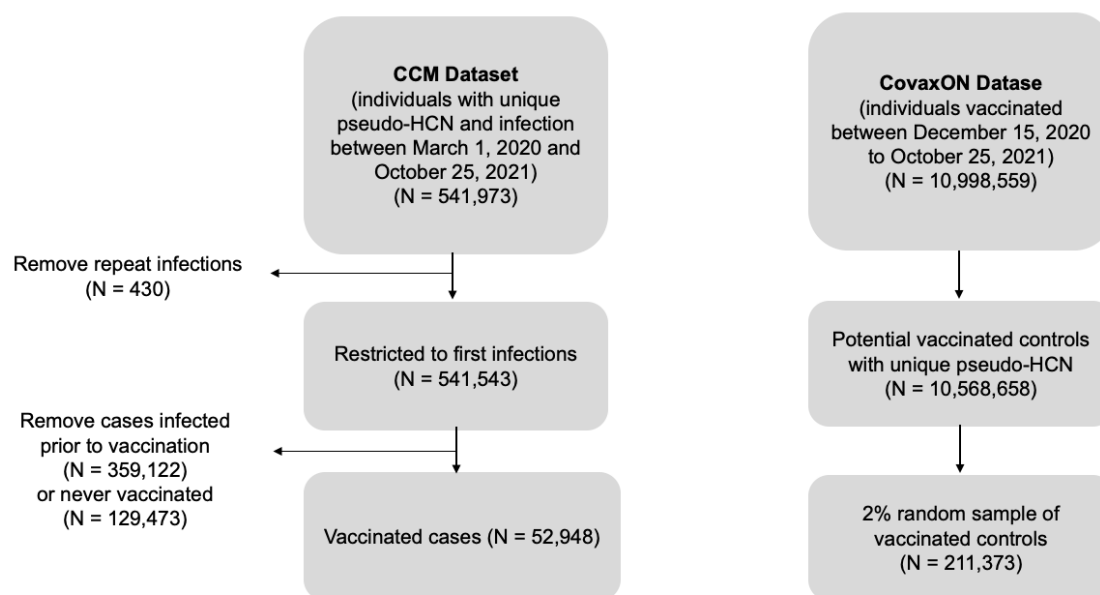

**Figure 2. Time to Infection Without SARS-CoV-2 Vaccination, or After 1 or 2 Vaccine**

**Doses**

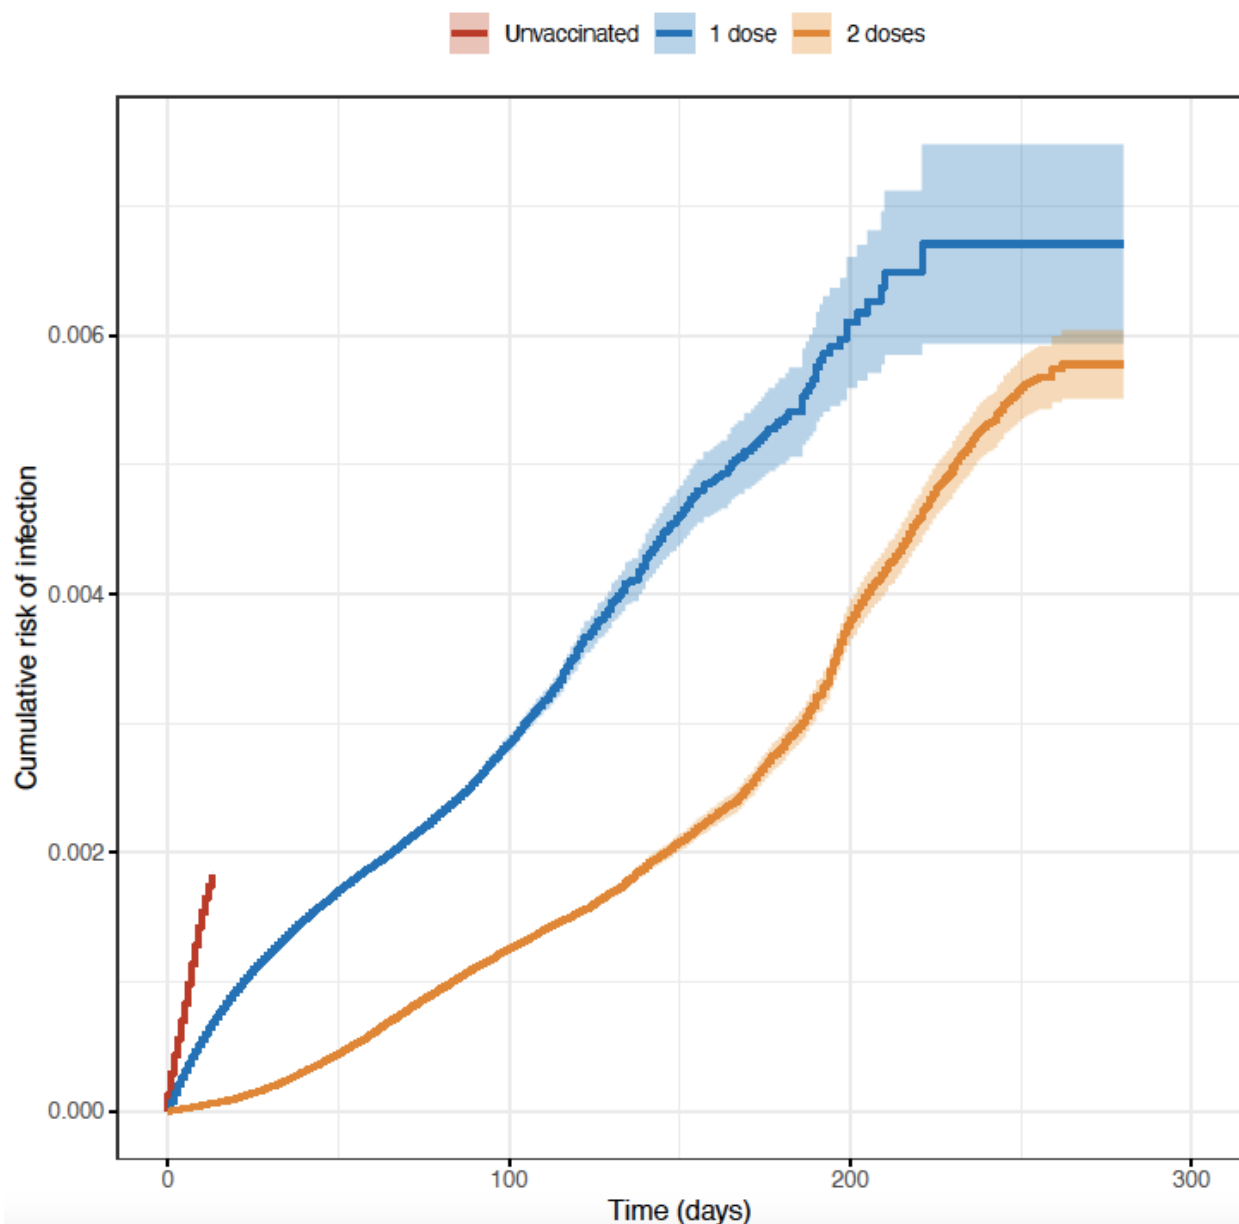

Vaccination status is treated as a time-varying covariate and defined by time since vaccination and cumulative doses, as described in the text. X-axis, person-time; Y-axis, cumulative incidence of infection. Shaded areas represent 95% confidence intervals.

### Figure 3. Relative Hazard of Infection by Time Since First or Second SARS-CoV-2 Vaccine

#### Dose

Hazard ratios for infection by vaccination status, with time stratified by 60-day blocks since vaccination. Circles, hazard ratios; vertical lines 95% CI.

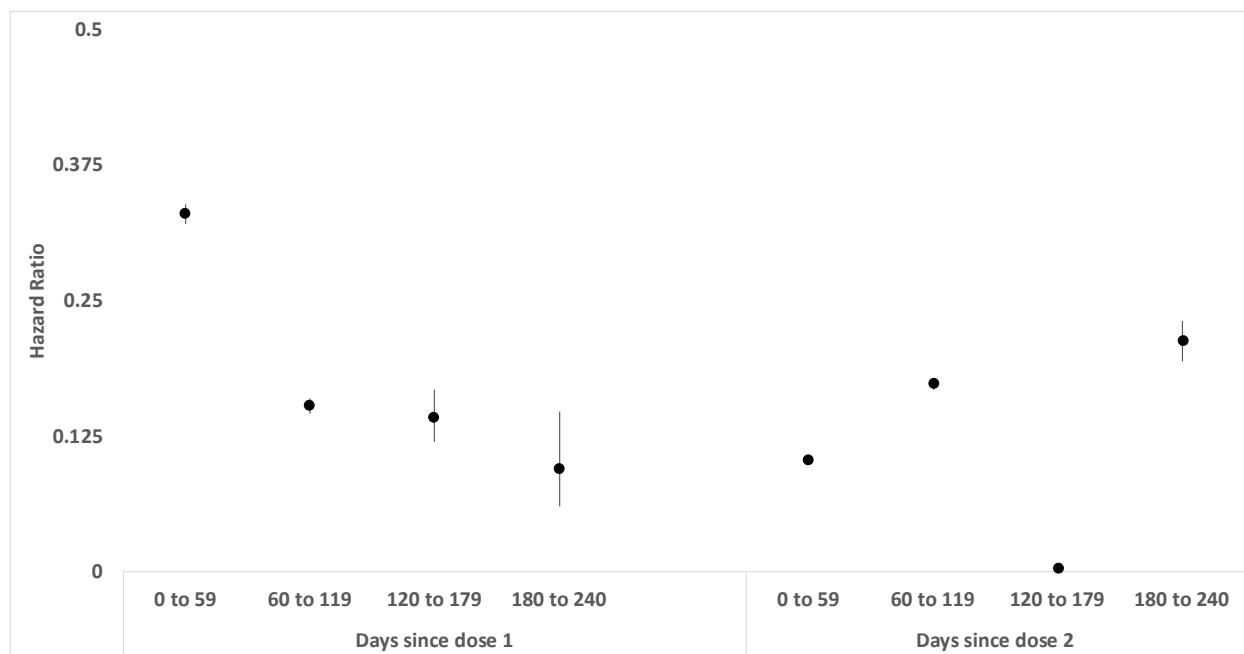

**Table 1: Characteristics of SARS-CoV-2-Vaccinated Cases and Controls, Ontario, Canada**

| <b>Covariate</b>   | <b>Cases</b> |         | <b>Controls</b> |         | <b>Total</b> |         | <b>P-value*</b> |
|--------------------|--------------|---------|-----------------|---------|--------------|---------|-----------------|
|                    | 52,948       |         | 211,373         |         | 264,321      |         |                 |
| Doses received (%) |              |         |                 |         |              |         |                 |
| 0                  | 18,531       | (35.00) | 1,598           | (0.76)  | 20,129       | (7.62)  | <0.001          |
| 1                  | 21,030       | (39.72) | 9,967           | (4.72)  | 30,997       | (11.73) |                 |
| 2                  | 13,387       | (25.28) | 199,808         | (94.53) | 213,195      | (80.66) |                 |
| Age group (%)      |              |         |                 |         |              |         |                 |
| Under 20           | 2,499        | (4.72)  | 24,432          | (9.24)  | 21,933       | (10.38) | <0.001          |
| 20 to 49           | 23,473       | (44.33) | 114,322         | (43.25) | 90,849       | (42.98) |                 |
| 50 to 65           | 14,144       | (26.71) | 65,682          | (24.85) | 51,538       | (24.38) |                 |
| 65 and older       | 12,832       | (24.24) | 59,885          | (22.66) | 47,053       | (22.26) |                 |
| Male (%)           |              |         |                 |         |              |         |                 |
| Yes                | 23,887       | (45.11) | 101,928         | (48.22) | 125,815      | (47.60) | <0.001          |
| No                 | 29,061       | (54.89) | 109,445         | (51.78) | 138,506      | (52.40) |                 |

|                                          |        |         |         |         |         |         |        |
|------------------------------------------|--------|---------|---------|---------|---------|---------|--------|
| Vaccine combination (%)†‡                |        |         |         |         |         |         |        |
| mRNA-mRNA                                | 12,270 | (91.66) | 182,861 | (91.52) | 195,131 | (91.53) | <0.001 |
| AZ-AZ                                    | 512    | (3.82)  | 4,499   | (2.25)  | 5,011   | (2.35)  |        |
| AZ-mRNA                                  | 597    | (4.46)  | 12,275  | (6.14)  | 12,872  | (6.04)  |        |
| Other                                    | 8      | (0.06)  | 173     | (0.09)  | 181     | (0.08)  |        |
| Documented congregate living (%)         |        |         |         |         |         |         |        |
| Yes                                      | 2,743  | (5.18)  | 2,863   | (1.35)  | 5,606   | (2.12)  | <0.001 |
| No                                       | 50,205 | (94.82) | 208,510 | (98.65) | 258,715 | (97.88) |        |
| Documented priority health condition (%) |        |         |         |         |         |         |        |
| Yes                                      | 1,360  | (2.57)  | 5,085   | (2.41)  | 6,448   | (2.44)  | 0.03   |
| No                                       | 51,588 | (97.43) | 206,288 | (97.59) | 257,973 | (97.56) |        |
| Documented healthcare worker (%)         |        |         |         |         |         |         |        |
| Yes                                      | 8,314  | (15.70) | 13,159  | (6.23)  | 21,473  | (8.12)  | <0.001 |
| No                                       | 44,634 | (84.30) | 198,214 | (93.77) | 242,848 | (91.88) |        |



|                                                  |    |         |    |         |    |         |        |
|--------------------------------------------------|----|---------|----|---------|----|---------|--------|
| Median days between first and second doses (IQR) | 64 | (46-79) | 59 | (42-76) | 60 | (42-77) | <0.001 |
|--------------------------------------------------|----|---------|----|---------|----|---------|--------|

**NOTE:** mRNA, Pfizer/BNT or Moderna mRNA vaccine; AZ, Oxford AstraZeneca or Covidshield vaccine (ChAdOx1-S).

\*Proportions compared with chi-squared test; dosing intervals compared with Wilcoxon signed-rank test.

**Table 2. Results of Multivariable Cox Proportional Hazards Model**

| <b>Covariate</b>            | <b>Hazard Ratio</b> | <b>95% Confidence Interval</b> |    |       | <b>P-value</b> |
|-----------------------------|---------------------|--------------------------------|----|-------|----------------|
| Vaccinated with single dose | 0.315               | 0.306                          | to | 0.324 | <0.001         |
| Vaccinated with two doses   | 0.137               | 0.133                          | to | 0.141 | <0.001         |
| Age group                   |                     |                                |    |       |                |
| 0-19 years                  | 0.588               | 0.563                          | to | 0.614 | <0.001         |
| 20-49 years                 |                     | 1 (referent)                   |    |       |                |
| 50-64 years                 | 0.931               | 0.909                          | to | 0.953 | <0.001         |
| 65+ years                   | 0.761               | 0.740                          | to | 0.783 | <0.001         |
| Male sex                    | 0.994               | 0.976                          | to | 1.013 | 0.559          |
| Congregate living           | 3.854               | 3.651                          | to | 4.069 | <0.001         |
| Healthcare worker           | 1.972               | 1.912                          | to | 2.034 | <0.001         |
| Priority health condition   | 1.181               | 1.115                          | to | 1.251 | <0.001         |
| Dosing interval (weeks)     |                     |                                |    |       |                |
| 0-13 days                   | 0.677               | 0.154                          | to | 2.979 | 0.606          |

|                 |       |       |              |       |        |
|-----------------|-------|-------|--------------|-------|--------|
| 14-27 days      |       |       | 1 (referent) |       |        |
| 28-41 days      | 0.690 | 0.659 | to           | 0.723 | <0.001 |
| 42-55 days      | 0.640 | 0.610 | to           | 0.671 | <0.001 |
| 56-69 days      | 0.790 | 0.755 | to           | 0.827 | <0.001 |
| 70-83 days      | 0.888 | 0.848 | to           | 0.931 | <0.001 |
| 84 days or more | 1.140 | 1.090 | to           | 1.192 | <0.001 |

---

2-dose combination

|           |       |       |              |       |        |
|-----------|-------|-------|--------------|-------|--------|
| mRNA-mRNA |       |       | 1 (referent) |       |        |
| AZ-AZ     | 1.412 | 1.338 | to           | 1.491 | <0.001 |
| AZ-mRNA   | 0.914 | 0.876 | to           | 0.953 | <0.001 |
| Other     | 1.522 | 1.446 | to           | 1.602 | <0.001 |

---

**NOTE:** mRNA, Pfizer/BNT or Moderna mRNA vaccine; AZ, Oxford AstraZeneca or Covidshield vaccine (ChAdOx1-S); 95% CI, confidence interval.

**Table 3. Strain- and Dose-Specific Efficacy of SARS-CoV-2 Vaccines in Restriction Analyses**

| Strain and Dose | Adjusted Hazard Ratio | 95% Confidence Interval |    |       | P-value |
|-----------------|-----------------------|-------------------------|----|-------|---------|
| Non-variant     |                       |                         |    |       |         |
| Dose 1          | 0.319                 | 0.305                   | to | 0.334 | <0.001  |
| Dose 2          | 0.202                 | 0.194                   | to | 0.211 | <0.001  |
| N501Y+          |                       |                         |    |       |         |
| Dose 1          | 0.346                 | 0.333                   | to | 0.360 | <0.001  |
| Dose 2          | 0.031                 | 0.029                   | to | 0.033 | <0.001  |
| Delta           |                       |                         |    |       |         |
| Dose 1          | 0.461                 | 0.416                   | to | 0.511 | <0.001  |
| Dose 2          | 0.339                 | 0.306                   | to | 0.375 | <0.001  |

**NOTE:** Estimates are derived from Cox proportional hazards models and adjusted for multiple covariates as in Table 2.

**Supplementary Table. Multivariable Cox Proportional Hazards Model with Stratified Time Since Vaccination**

| <b>Covariate</b>       | <b>Hazard Ratio</b> | <b>95% Confidence Interval</b> |    |       | <b>P-value</b> |
|------------------------|---------------------|--------------------------------|----|-------|----------------|
| Time since vaccination |                     |                                |    |       |                |
| Dose 1                 |                     |                                |    |       |                |
| 0 to 59                | 0.330               | 0.320                          | to | 0.339 | <0.001         |
| 60 to 119              | 0.152               | 0.145                          | to | 0.159 | <0.001         |
| 120 to 179             | 0.141               | 0.120                          | to | 0.167 | <0.001         |
| 180 to 240             | 0.094               | 0.060                          | to | 0.148 | <0.001         |
| Dose 2                 |                     |                                |    |       |                |
| 0 to 59                | 0.103               | 0.100                          | to | 0.106 | <0.001         |
| 60 to 119              | 0.173               | 0.167                          | to | 0.178 | <0.001         |
| 120 to 179             | 0.003               | 0.001                          | to | 0.005 | <0.001         |
| 180 to 240             | 0.212               | 0.194                          | to | 0.231 | <0.001         |
| Age group              |                     |                                |    |       |                |
| 0-19 years             | 0.590               | 0.565                          | to | 0.616 | <0.001         |
| 20-49 years            |                     | 1 (referent)                   |    |       |                |

|                           |       |              |    |       |        |
|---------------------------|-------|--------------|----|-------|--------|
| 50-64 years               | 0.925 | 0.904        | to | 0.947 | <0.001 |
| 65+ years                 | 0.753 | 0.732        | to | 0.774 | <0.001 |
| Male sex                  | 0.995 | 0.977        | to | 1.014 | 0.595  |
| Congregate living         | 3.961 | 3.767        | to | 4.165 | <0.001 |
| Healthcare worker         | 1.917 | 1.860        | to | 1.976 | <0.001 |
| Priority health condition | 1.190 | 1.124        | to | 1.260 | <0.001 |
| Dosing interval (weeks)   |       |              |    |       |        |
| 0-13 days                 | 0.721 | 0.170        | to | 3.053 | 0.657  |
| 14-27 days                |       | 1 (referent) |    |       |        |
| 28-41 days                | 0.740 | 0.707        | to | 0.775 | <0.001 |
| 42-55 days                | 0.672 | 0.641        | to | 0.705 | <0.001 |
| 56-69 days                | 0.825 | 0.789        | to | 0.863 | <0.001 |
| 70-83 days                | 0.954 | 0.911        | to | 0.998 | 0.042  |
| 84 days or more           | 1.302 | 1.247        | to | 1.359 | <0.001 |
| Vaccine combination (%)   |       |              |    |       |        |
| mRNA-mRNA                 |       | 1 (referent) |    |       |        |

|         |       |       |    |       |        |
|---------|-------|-------|----|-------|--------|
| AZ-AZ   | 1.389 | 1.317 | to | 1.466 | <0.001 |
| AZ-mRNA | 0.900 | 0.864 | to | 0.939 | <0.001 |
| Other   | 1.578 | 1.503 | to | 1.657 | <0.001 |

---

**NOTE:** mRNA, Pfizer/BNT or Moderna mRNA vaccine; AZ, Oxford AstraZeneca or Covidshield vaccine (ChAdOx1-S); 95% CI, confidence interval





## References

1. Kreier F. 'Unprecedented achievement': who received the first billion COVID vaccinations? *Nature*. 2021.
2. Mesle MM, Brown J, Mook P, Hagan J, Pastore R, Bundle N, et al. Estimated number of deaths directly averted in people 60 years and older as a result of COVID-19 vaccination in the WHO European Region, December 2020 to November 2021. *Euro Surveill*. 2021;26(47).
3. Gupta S, Cantor J, Simon KI, Bento AI, Wing C, Whaley CM. Vaccinations Against COVID-19 May Have Averted Up To 140,000 Deaths In The United States. *Health Aff (Millwood)*. 2021;40(9):1465-72.
4. Higdon MM, Wahl B, Jones CB, Rosen JG, Truelove SA, Baidya A, et al. A systematic review of COVID-19 vaccine efficacy and effectiveness against SARS-CoV-2 infection and disease. *medRxiv*. 2021:2021.09.17.21263549.
5. Wu P, Hao X, Lau EHY, Wong JY, Leung KSM, Wu JT, et al. Real-time tentative assessment of the epidemiological characteristics of novel coronavirus infections in Wuhan, China, as at 22 January 2020. *Euro Surveill*. 2020;25(3).
6. Jablonska K, Aballea S, Toumi M. The real-life impact of vaccination on COVID-19 mortality in Europe and Israel. *Public Health*. 2021;198:230-7.
7. Greinacher A, Selleng K, Palankar R, Wesche J, Handtke S, Wolff M, et al. Insights in ChAdOx1 nCoV-19 vaccine-induced immune thrombotic thrombocytopenia. *Blood*. 2021;138(22):2256-68.

8. Witberg G, Barda N, Hoss S, Richter I, Wiessman M, Aviv Y, et al. Myocarditis after Covid-19 Vaccination in a Large Health Care Organization. *N Engl J Med*. 2021;385(23):2132-9.
9. Schmidt T, Klemis V, Schub D, Mihm J, Hielscher F, Marx S, et al. Immunogenicity and reactogenicity of heterologous ChAdOx1 nCoV-19/mRNA vaccination. *Nat Med*. 2021;27(9):1530-5.
10. Payne RP, Longet S, Austin JA, Skelly DT, Dejnirattisai W, Adele S, et al. Immunogenicity of standard and extended dosing intervals of BNT162b2 mRNA vaccine. *Cell*. 2021;184(23):5699-714 e11.
11. Barda N, Dagan N, Cohen C, Hernan MA, Lipsitch M, Kohane IS, et al. Effectiveness of a third dose of the BNT162b2 mRNA COVID-19 vaccine for preventing severe outcomes in Israel: an observational study. *Lancet*. 2021;398(10316):2093-100.
12. Burki T. Booster shots for COVID-19-the debate continues. *Lancet Infect Dis*. 2021;21(10):1359-60.
13. Statistics Canada. Population estimates, quarterly. Table: 17-10-0009-01 (formerly CANSIM 051-0005). Available via the Internet at <https://www150.statcan.gc.ca/t1/tb11/en/tv.action?pid=1710000901>. Last accessed May 29, 2020. 2020.
14. Ontario Agency for Health Protection and Promotion (Public Health Ontario). COVID-19 vaccine uptake in Ontario: December 14, 2020 to November 28, 2021. Available via the Internet at [publichealthontario.ca/-/media/documents/ncov/epi/covid-19-vaccine-uptake-ontario-epi-summary.pdf?la=en](https://publichealthontario.ca/-/media/documents/ncov/epi/covid-19-vaccine-uptake-ontario-epi-summary.pdf?la=en). Last accessed December 7, 2021. 2021.

15. Ontario Ministry of Health. Ontario's COVID-19 vaccination plan. Available via the Internet at <https://covid-19.ontario.ca/ontarios-covid-19-vaccination-plan#our-three-phased-vaccination-plan>. Last accessed December 8, 2021. 2021.
16. Tuite AR, Zhu L, Fisman DN, Salomon JA. Alternative Dose Allocation Strategies to Increase Benefits From Constrained COVID-19 Vaccine Supply. *Ann Intern Med*. 2021;174(4):570-2.
17. Ontario Ministry of Health. COVID-19 Vaccine Bookings to Open For All Children Aged Five to 11. Families can book appointments through a variety of channels starting November 23rd. Available via the Internet at <https://news.ontario.ca/en/release/1001195/covid-19-vaccine-bookings-to-open-for-all-children-aged-five-to-11>. Last accessed December 8, 2021. 2021.
18. Skowronski DM, Setayeshgar S, Febriani Y, Ouakki M, Zou M, Talbot D, et al. Two-dose SARS-CoV-2 vaccine effectiveness with mixed schedules and extended dosing intervals: test-negative design studies from British Columbia and Quebec, Canada. *medRxiv*. 2021:2021.10.26.21265397.
19. Health OMo. COVID-19 vaccine third dose recommendations. Available via the Internet at [https://www.health.gov.on.ca/en/pro/programs/publichealth/coronavirus/docs/vaccine/COVID-19\\_vaccine\\_third\\_dose\\_recommendations.pdf](https://www.health.gov.on.ca/en/pro/programs/publichealth/coronavirus/docs/vaccine/COVID-19_vaccine_third_dose_recommendations.pdf). Last accessed December 8, 2021. 2021.
20. Fisman DN, Greer AL, Hillmer M, O'Brien SF, Drews SJ, Tuite AR. COVID-19 case age distribution: correction for differential testing by age. *medRxiv*. 2020:2020.09.15.20193862.
21. Fisman DN, Tuite AR. Evaluation of the relative virulence of novel SARS-CoV-2 variants: a retrospective cohort study in Ontario, Canada. *CMAJ*. 2021;193(42):E1619-E25.

22. Dagan N, Barda N, Kepten E, Miron O, Perchik S, Katz MA, et al. BNT162b2 mRNA Covid-19 Vaccine in a Nationwide Mass Vaccination Setting. *N Engl J Med*. 2021;384(15):1412-23.
23. Chung H, He S, Nasreen S, Sundaram ME, Buchan SA, Wilson SE, et al. Effectiveness of BNT162b2 and mRNA-1273 COVID-19 vaccines against symptomatic SARS-CoV-2 infection and severe COVID-19 outcomes in Ontario, Canada. *medRxiv*. 2021:2021.05.24.21257744.
24. Ontario Ministry of Health. COVID-19 Fully Vaccinated Status in Ontario. Available via the Internet at [https://www.health.gov.on.ca/en/pro/programs/publichealth/coronavirus/docs/vaccine/COVID-19\\_fully\\_vaccinated\\_status\\_ontario.pdf](https://www.health.gov.on.ca/en/pro/programs/publichealth/coronavirus/docs/vaccine/COVID-19_fully_vaccinated_status_ontario.pdf). Last accessed December 2, 2021. 2021.
25. Grambsch PM, Therneau TM. Proportional hazards tests and diagnostics based on weighted residuals. *Biometrika*. 1994; 81:515–26.
26. von Elm E, Altman DG, Egger M, Pocock SJ, Gotsche PC, Vandenbroucke JP, et al. The Strengthening the Reporting of Observational Studies in Epidemiology (STROBE) statement: guidelines for reporting observational studies. *Bull World Health Organ*. 2007;85(11):867-72.
27. Ostadgavahi AT, Booth R, Sisson G, McMullen N, Warhuus M, Robertson P, et al. Heterologous immunization with Covishield and Pfizer vaccines against SARS-CoV-2 elicits a robust humoral immune response. *J Infect Dev Ctries*. 2021;15(5):653-6.
28. Munro APS, Janani L, Cornelius V, Aley PK, Babbage G, Baxter D, et al. Safety and immunogenicity of seven COVID-19 vaccines as a third dose (booster) following two doses of

ChAdOx1 nCov-19 or BNT162b2 in the UK (COV-BOOST): a blinded, multicentre, randomised, controlled, phase 2 trial. *Lancet*. 2021.

29. European Medicines Agency. Heterologous primary and booster COVID-19 vaccination. Evidence based regulatory considerations. Available via the Internet at [https://www.ema.europa.eu/en/documents/report/heterologous-primary-booster-covid-19-vaccination-evidence-based-regulatory-considerations\\_en.pdf](https://www.ema.europa.eu/en/documents/report/heterologous-primary-booster-covid-19-vaccination-evidence-based-regulatory-considerations_en.pdf). Last accessed January 2, 2022.; 2021.

30. Nordstrom P, Ballin M, Nordstrom A. Effectiveness of heterologous ChAdOx1 nCoV-19 and mRNA prime-boost vaccination against symptomatic Covid-19 infection in Sweden: A nationwide cohort study. *Lancet Reg Health Eur*. 2021;11:100249.

31. World Health Organization. Interim recommendations for heterologous COVID-19 vaccine schedules. Available via the Internet at <https://www.who.int/publications/i/item/WHO-2019-nCoV-vaccines-SAGE-recommendation-heterologous-schedules> . Last accessed January 2, 2022. 2021.
